# Supplementary material for: Characterization of the neurogenic niche in the aging dentate gyrus using iterative immunofluorescence imaging
Source: eLife. 2022 Jan 28;11:e68000. doi: 10.7554/eLife.68000 (PMC8798039; doi:10.7554/eLife.68000)
Supplement: Supplementary file 1. [file elife-68000-supp1.xlsx]

## Sheet: Sheet1
Supplementary Table 1 | Statistics results table
N.B. Statistics results are sorted by figure, and both main figures and supplementary figures are listed in the order they appear in the text. Significance was set at an alpha level of 0.05
Table 1 | Statistics Results
Fig. 1	Measure	Values				N	Statistical test		Significance
Fig. 1E	Fluorescent intensity normalized to background of HOPX, IBA1, and SOX2 before and after six elution cycles. Values are the mean ± SD.	ARC: Cycle 1: 2.928 ± 0.7536 A.U. Elution: 1.465 ± 0.3057 A.U. Cycle 6: 2.783 ± 0.7353 A.U. CD13: Cycle 1: 2.733 ± 0.7703 A.U. Elution: 0.9586 ± 0.1435 A.U. Cycle 6: 2.786 ± 1.119 A.U. CollagenIV: Cycle 1: 2.525 ± 0.8427 A.U. Elution: 1.056 ± 0.07188 A.U. Cycle 6: 3.649 ± 1.409 A.U. DCX: Cycle 1: 2.569 ± 0.4808 A.U. Elution: 0.9912 ± 0.08475 A.U. Cycle 6: 2.394 ± 0.4693 A.U. GFAP: Cycle 1: 4.019 …	IBA1: Cycle 1: 3.492 ± 1.768 A.U. Elution: 1.019 ± 0.1275 A.U. Cycle 6: 4.114 ± 1.324 A.U. LaminB1: Cycle 1: 5.428 ± 1.87 A.U. Elution: 1.643 ± 0.3385 A.U. Cycle 6: 3.162 ± 0.7479 A.U. Nestin: Cycle 1: 2.434 ± 0.564 A.U. Elution: 1.004 ± 0.1446 A.U. Cycle 6: 2.347 ± 0.7008 A.U. NG2: Cycle 1: 2.402 ± 0.2317 A.U. Elution: 0.9876 ± 0.04053 A.U. Cycle 6: 1.958 ± 0.1464 A.U. OLIG2: Cycle 1: 10.27 ± 6.…	SOX2: Cycle 1: 9.426 ± 3.36 A.U. Elution: 1.051 ± 0.1001 A.U. Cycle 6: 8.696 ± 2.410 A.U. ID4: Cycle 1: 1.467 ± 0.09376 A.U. Elution: 0.9634 ± 0.06901 A.U. Cycle 6: 1.604 ± 0.4561 A.U. MT3: Cycle 1: 1.618 ± 0.2414 A.U. Elution: 1.014 ± 0.04822 A.U. Cycle 6: 1.808 ± 0.1904 A.U.		ARC: n = 48 cells CD13: n = 193 ROIs CollagenIV: n = 458 ROIs DCX: n = 130 cells GFAP: n = 443 ROIs HOPX: n= 408 cells IBA1: n = 316 cells LaminB1: n = 100 cells Nestin: n = 199 ROIs NG2: n = 387 ROIs OLIG2: n = 297 ROIs S100β: n = 298 cells SOX2: n = 670 cells ID4: n = 167 cells MT3: n = 249 cells	Pearsons Correlation Coefficient: ARC: C1 vs E: r2 = 0.1006 C1 vs C6: r2 = 0.7838 CD13: C1 vs E: r2 = 0.008973 C1 vs C6: r2 = 0.7009 CollagenIV: C1 vs E: r2 = 0.09592 C1 vs C6: r2 = 0.8043 DCX: C1 vs E: r2 = 0.1089 C1 vs C6: r2 = 0.7698 GFAP: C1 vs E: r2 = 0.07297 C1 vs C6: r2 = 0.6721 HOPX: C1 vs E: r2 = 0.01510 C1 vs C6: r2 = 0.7196 IBA1: C1 vs E: r2 = 0.09407 C1 vs C6: r2 = 0.7179	LaminB1: C1 vs E: r2 = 0.2630 C1 vs C6: r2 = 0.9147 Nestin: C1 vs E: r2 = 0.02055 C1 vs C6: r2 = 0.8270 NG2: C1 vs E: r2 = 0.005207 C1 vs C6: r2 = 0.7007 OLIG2: C1 vs E: r2 = 0.01599 C1 vs C6: r2 = 0.8286 S100β: C1 vs E: r2 = 0.05630 C1 vs C6: r2 = 0.7921 SOX2: C1 vs E: r2 = 0.002729 C1 vs C6: r2 = 0.8051 ID4: C1 vs E: r2 = 0.01400 C1 vs C6: r2 = 0.001589 MT3: C1 vs E: r2 = 0.001210 C1 vs C6: r2 …	Pearsons Correlation Coefficient: ARC: C1 vs E: p = 0.0281 C1 vs C6: p < 0.0001 CD13: C1 vs E: p = 0.1901 C1 vs C6: p < 0.0001 CollagenIV: C1 vs E: p < 0.0001 C1 vs C6: p < 0.0001 DCX: C1 vs E: p < 0.0001 C1 vs C6: p < 0.0001 GFAP: C1 vs E: p < 0.0001 C1 vs C6: p < 0.0001 HOPX: C1 vs E: p = 0.0133 C1 vs C6: p < 0.0001 IBA1: C1 vs E: p < 0.0001 C1 vs C6: p < 0.0001	LaminB1: C1 vs E: p < 0.0001 C1 vs C6: p < 0.0001 Nestin: C1 vs E: p < 0.0434 C1 vs C6: p < 0.0001 NG2: C1 vs E: p = 0.1565 C1 vs C6: p < 0.0001 OLIG2: C1 vs E: p = 0.0294 C1 vs C6: p < 0.0001 S100β: C1 vs E: p < 0.0001 C1 vs C6: p < 0.0001 SOX2: C1 vs E: p = 0.1771 C1 vs C6: p < 0.0001 ID4: C1 vs E: p = 0.1277 C1 vs C6: p = 0.6090 MT3: C1 vs E: p = 0.5848 C1 vs C6: p < 0.0001
Fig. 3	Measure	Values				N	Statistical test		Significance
Fig. 3B	Densities of R cells, proliferative R cells, proliferating NR cells, and immature neurons in the DG of 2 and 12-month old mice. Values are the mean ± SD.	R Cells: 2mon: 29746 ± 3717/mm3 12mon: 16483 ± 3493/mm3 KI67+ R Cells: 2mon: 1279 ± 896.7/mm3 12mon: 336 ± 339.2/mm3 KI67+ NR Cells: 2mon: 6126 ± 1356/mm3 12mon: 1765 ± 421.1/mm3 DCX+ Cells: 2mon: 52028± 10814/mm3 12mon: 3630 ± 684.5/mm3				2mon: n = 9 (3 sections from 3 C57BL/6 mice) 12mon: n = 9 (3 section from 3 C57BL/6 mice)	Unpaired t-test: R Cells: t(16) = 7.801 Welch's t-test: KI67+ R Cells: t(10.24) = 2.951 KI67+ NR Cells: t(9.529) = 9.215 DCX+ Cells: t(8.136) = 12.49		Unpaired t-test: R Cells: p < 0.0001, two-tailed Welch's t-test: KI67+ R Cells: p = 0.0142, two-tailed KI67+ NR Cells: p < 0.0001, two-tailed DCX+ Cells: p < 0.0001, two-tailed
Fig. 3C	Densities of IBA1+ microglia, S100β+ Astrocytes, and NG2+ OPCs in the total sample areas, and the GCL, ML, and hilus subregions of 2 and 12-month old mice. Values are the mean ± SD.	Total Tissue: IBA1: 2mon: 10691 ± 762.5/mm3 12mon: 11488 ± 1299/mm3 S100β: 2mon: 22962 ± 1557/mm3 12mon: 20212 ± 1831/mm3 NG2: 2mon: 10705 ± 1484/mm3 12mon: 10601 ± 2147/mm3	ML: IBA1: 2mon: 8528 ± 496.5/mm3 12mon: 9602 ± 1018/mm3 S100β: 2mon: 20811 ± 1359/mm3 12mon: 18471 ± 1224/mm3 NG2: 2mon: 10954 ± 2174/mm3 12mon: 10635 ± 2088/mm3			2mon: n = 9 (3 section from 3 C57BL/6 mice) 12mon: n = 9 (3 section from 3 C57BL/6 mice)	Unpaired t-test: Total Tissue: IBA1: t(16) = 1.588 S100β: t(16) = 3.432 NG2: t(16) = 0.1196 GCL: IBA1: t(16) = 0.06749 S100β: t(16) = 1.243 NG2: t(16) = 0.4765 ML: IBA1: t(16) = 2.845 S100β: t(16) = 3.837 NG2: t(16) = 0.3182 Hilus: IBA1: t(16) = 1.767 S100β: t(16) = 2.219 NG2: t(16) = 0.5865		Unpaired t-test: Total Tissue: IBA1: p = 0.1319, two-tailed S100β: p = 0.0034, two-tailed NG2: p = 0.9063, two-tailed GCL: IBA1: p = 0.9470, two-tailed S100β: p = 0.2316, two-tailed NG2: p = 0.6401, two-tailed ML: IBA1: p = 0.0117, two-tailed S100β: p = 0.0015, two-tailed NG2: p = 0.7544, two-tailed Hilus: IBA1: p = 0.0963, two-tailed S100β: p = 0.0413, two-tailed NG2: p = 0.5657, two-tailed
		GCL: IBA1: 2mon: 11527 ± 2004/mm3 12mon: 11450 ± 2801/mm3 S100β: 2mon: 15662 ± 2321/mm3 12mon: 13973 ± 3350/mm3 NG2: 2mon: 6070 ± 874.1/mm3 12mon: 6457 ± 2271/mm3	Hilus: IBA1: 2mon: 7341 ± 1327/mm3 12mon: 8452 ± 1339/mm3 S100β: 2mon: 22717 ± 2178/mm3 12mon: 20090 ± 2805/mm3 NG2: 2mon: 9090 ± 1268/mm3 12mon: 8732 ± 1326/mm3
Fig. 4	Measure	Values				N	Statistical test		Significance
Fig. 4A	Fluorescent intensity normalized to background in arbitrary units (A.U.) of quiescent markers HOPX, MT3 in R cells and astrocytes of 2 and 12-month-old mice. Values are the mean ± SD.	R Cells: HOPX: 2mon: 6.145 ± 1.827 A.U. 12mon: 6.852 ± 2.061 A.U. MT3: 2mon: 1.567 ± 0.6639 A.U. 12mon: 2.155 ± 1.267 A.U.	Astrocytes: HOPX: 2mon: 2.516 ± 1.229 A.U. 12mon: 2.343 ± 0.9459 A.U. MT3: 2mon: 3.023 ± 1.121 A.U. 12mon: 2.915 ± 1.052 A.U.			R Cells: 2mon: n= 508 R cells 12mon: n = 296 R cells Astrocytes: 2mon: n = 300 12mon: n = 311	R Cells: Unpaired t-test: HOPX: t(802) = 2.516 MT3: t(802) =8.623 Astrocytes: Welch's t-test: HOPX: t(561.5) = 1.947 MT3: t(603) = 1.229		R Cells: Unpaired t-test: HOPX: p = 0.0121, two-tailed MT3: p < 0.0001, two-tailed Astrocytes: Welch's t-test: HOPX: p = 0.0520 MT3: p = 0.2195
Fig. 4B	Fluorescent intensity normalized to background in arbitrary units (A.U.) of LaminB1 in R cells, DCX+ immature neurons, PV interneurons, IBA1+ microglia, and S100β+ astrocytes of 2 and 12-month-old mice. Values are the mean ± SD.	R Cells: 2mon: 5.700 ± 1.959 A.U. 12mon: 3.479 ± 1.616 A.U. DCX: 2mon: 7.368 ± 2.100 A.U. 12mon: 5.864 ± 1.837 A.U. PV: 2mon: 4.776 ± 1.872 A.U. 12mon: 4.629 ± 2.104 A.U. IBA1: 2mon: 2.522 ± 1.004 A.U. 12mon: 2.442 ± 0.8606 A.U. S100β: 2mon: 4.574 ± 1.818 A.U. 12mon: 4.470 ± 2.263 A.U.				R Cells: 2mon: 508 cells 12mon: 296 cells DCX: 2mon: 914 cells 12mon: 58 cells PV: 2mon: 53 cells 12mon: 76 cells IBA1: 2mon: 293 cells 12mon: 294 cells S100β: 2mon: 294 cells 12mon: 306 cells	Welch's t-test: R Cells: t(712.3) = 17.35 Unpaired t-test: DCX: t(970) = 5.327 PV: t(127) = 0.4065 Welch's t-test: IBA1: t(571.1) = 1.028 S100β: t(580) = 0.6252		Welch's t-test: R Cells: p < 0.001, two-tailed Unpaired t-test: DCX: p < 0.0001, two-tailed PV: p = 0.6851 Welch's t-test: IBA1: p = 0.3042 S100β: p = 0.5321
						Taken from 1 section each from three animals per age group.
Fig. 5	Measure	Values				N	Statistical test		Significance
Fig. 5B	Quantification of vascular density measured as the percentage of the sampled tissue volume occupied by CollagenIV+ blood vessels. Values are the mean ± SD.	2mon: 2.632 ± 0.7645 % 6mon: 1.812 ± 0.4793 % 12mon: 1.818 ± 0.5870 %				2mon: n = 12 DGs 6mon: n = 10 DGs 12mon: n = 12 DGs Taken from three animals per age group.	Ordinary One-Way ANOVA: F(2, 31) = 6.524		Ordinary One-Way ANOVA: ANOVA: p = 0.0043 Tukey's Multiple Comparisons Test: 2mon vs 6mon: p = 0.0129 2mon vs 12mon: p = 0.0094 6mon vs 12mon: p = 0.9998
Fig. 5D	Quantification of colocalization of CD13+ pericytes, GFAP+ astrocytes, Nestin+ R cell processes, IBA1+ microglia, and NG2+ OPCs in 2, 6, and 12-month-old mice. Values are the mean ± SD.	CD13: 2mon: 34.96 ± 7.894 % 6mon: 27.73 ± 5.392 % 12mon: 23.24 ± 4.171 % GFAP: 2mon: 7.809 ± 2.745 % 6mon: 13.98 ± 2.680 % 12mon: 16.85 ± 6.229 % Nestin: 2mon: 2.136 ± 0.3348 % 6mon: 0.5286 ± 0.3304 % 12mon: 0.3820 ± 0.2200 % IBA1: 2mon: 2.337 ± 0.7512 % 6mon: 3.203 ± 0.9416 % 12mon: 3.450 ± 0.8807 % NG2: 2mon: 5.779 ± 1.938 % 6mon: 5.829 ± 1.228 % 12mon: 6.074 ± 2.751 %				2mon: n = 12 DGs 6mon: n = 10 DGs 12mon: n = 12 DGs Taken from three animals per age group.	Ordinary One-Way ANOVA: CD13: F(2, 31) = 11.40 Welch's ANOVA: GFAP: F(2, 31) = 13.75 Ordinary One-Way ANOVA: Nestin: F(2, 31) = 125.3 Iba1: F(2, 31) = 5.538 NG2: F(2, 31) = 0.06612		CD13: ANOVA: p = 0.0002 Tukey's Multiple Comparisons Test: 2mon vs 6mon: p = 0.0129 2mon vs 12mon: p = 0.0001 6mon vs 12mon: p = 0.2099 GFAP: ANOVA: p < 0.0001 Tukey's Multiple Comparisons Test: 2mon vs 6mon: p = 0.0059 2mon vs 12mon: p < 0.0001 6mon vs 12mon: p = 0.2791 Nestin: ANOVA: p < 0.0001 Tukey's Multiple Comparisons Test: 2mon vs 6mon: p < 0.0001 2mon vs 12mon: p < 0.0001 6mon vs 12mon: …
									IBA1: ANOVA: p = 0.0088 Tukey's Multiple Comparisons Test: 2mon vs 6mon: p = 0.0619 2mon vs 12mon: p = 0.0089 6mon vs 12mon: p = 0.7794 NG2: ANOVA: p = 0.9362
Fig. 6	Measure	Values				N	Statistical test		Significance
Fig. 6B	Quantification of cellular contents of randomly sampled areas of the DG neurogenic niches of 2, 6, and 12-month-old mice. Values are the mean ± SD.	ARC: 2mon: 0.0365 ± 0.0482% 6mon: 0.0269 ± 0.0388% 12mon: 0.0126 ± 0.023% CD13: 2mon: 0.4515 ± 0.3213% 6mon: 0.3562 ± 0.2797% 12mon: 0.3505 ± 0.3062% CollagenIV: 2mon: 1.6482 ± 0.7403% 6mon: 1.1953 ± 0.4638% 12mon: 1.2177 ± 0.5498% DCX: 2mon: 1.1456 ± 0.8375% 6mon: 0.1955 ± 0.2069% 12mon: 0.0782 ± 0.0629% GFAP: 2mon: 0.8833 ± 0.5207% 6mon: 0.9641 ± 0.6434% 12mon: 0.9021 ± 0.6067% IBA1: 2mon: 0.79…				2mon: n = 521 Spots 6mon: n = 414 Spots 12mon: n = 516 Spots Taken from three animals per age group.	Welch's ANOVA: Arc: W(2, 830.9) = 63.07 CD13: W(2, 927.8) = 11.08 CollagenIV: W(2, 956.9) = 73.89 DCX: W(2, 664.5)= 476.1 GFAP: W(2, 916.1) = 2.184 Iba1: W(2, 839.6) = 197.4 Ki67: W(2, 910.6) = 51.97 Nestin: W(2, 901.5) = 336.8 NG2: W(2, 876.4) = 18.52 PV: W(2, 913) = 0.0113 Sox2: W(2, 734.5) = 88.19		ARC: ANOVA: p < 0.0001 Games-Howell's Multiple Comparisons Test: 2mon vs 6mon: p = 0.0024 2mon vs 12mon: p < 0.0001 6mon vs 12mon: p < 0.0001 CD13: ANOVA: p < 0.0001 Games-Howell's Multiple Comparisons Test: 2mon vs 6mon: p < 0.0001 2mon vs 12mon: p < 0.0001 6mon vs 12mon: p = 0.9539 CollagenIV: ANOVA: p < 0.0001 Games-Howell's Multiple Comparisons Test: 2mon vs 6mon: p < 0.0001 2mon vs 12mon: p …	KI67: ANOVA: p < 0.0001 Games-Howell's Multiple Comparisons Test: 2mon vs 6mon: p < 0.0001 2mon vs 12mon: p < 0.0001 6mon vs 12mon: p = 0.7847 Nestin: ANOVA: p < 0.0001 Games-Howell's Multiple Comparisons Test: 2mon vs 6mon: p < 0.0001 2mon vs 12mon: p < 0.0001 6mon vs 12mon: p = 0.1493 NG2: ANOVA: p < 0.0001 Games-Howell's Multiple Comparisons Test: 2mon vs 6mon: p < 0.0001 2mon vs 12mon: p = 0.…
Fig. 6E	Comparison of the cellular contents of young and old spots as determined by k-means clustering in 2-month-old mice. Values are the mean ± SD.	ARC: Young: 0.0321 ± 0.0408% Old: 0.0398 ± 0.0528% CD13: Young: 0.5413 ± 0.8766% Old: 0.4535 ± 0.3488% CollagenIV: Young: 1.8135 ± 0.7996% Old: 1.5255 ± 0.6682% DCX: Young: 1.3795 ± 0.9201% Old: 0.9719 ± 0.7247% GFAP: Young: 0.8793 ± 0.4742% Old: 0.8862 ± 0.5534% IBA1: Young: 0.876 ± 0.2829% Old: 0.7373 ± 0.2986% KI67: Young: 0.048 ± 0.0431% Old: 0 ± 0%				Young: n = 300 Spots Old: n = 221 Spots Taken from four DGs from three 2-month-old animals.	Multiple t-tests: ARC: t(519) = 1.948 CD13: t(517) = 2.015 CollagenIV: t(519) = 10.31 DCX: t(519) = 14.58 GFAP: t(519) = 1.841 IBA1: t(519) = 11.92 KI67: t(519) = 8.462 Nestin: t(519) = 10.01 NG2: t(519) = 10.76 PV: t(519) = 2.765 SOX2: t(519) = 16.59		Multiple t-tests: ARC: p = 0.1275 CD13: p = 0.1275 CollagenIV: p < 0.0001 DCX: p < 0.0001 GFAP: p = 0.1275 IBA1: p < 0.0001 KI67: p < 0.0001 Nestin: p < 0.0001 NG2: p < 0.0001 PV: p = 0.0233 SOX2: p < 0.0001
		Nestin: Young: 1.1306 ± 0.7232% Old: 0.7685 ± 0.5559% NG2: Young: 0.5736 ± 0.3153% Old: 0.5021 ± 0.243% PV: Young: 0.1035 ± 0.1391% Old: 0.0823 ± 0.1429% SOX2: Young: 1.0833 ± 0.3392% Old: 0.8094 ± 0.2968%
Fig. 6F	Comparison of the cellular contents of high and low Nestin populated spots in 2, 6, and 12-month-old mice. Values are the mean ± SD.	2mon: ARC: High Nestin: 0.0364 ± 0.0487% Low Nestin: 0.0369 ± 0.0461% CD13: High Nestin: 0.4701 ± 0.6513% Low Nestin: 0.5775 ± 0.5326% CollagenIV: High Nestin: 1.643 ± 0.7216% Low Nestin: 1.668 ± 0.8169% DCX: High Nestin: 1.2379 ± 0.8621% Low Nestin: 0.7620 ± 0.5905% GFAP: High Nestin: 0.881 ± 0.4866% Low Nestin: 0.8928 ± 0.6461% IBA1: High Nestin: 0.7997 ± 0.3018% Low Nestin: 0.7830 ± 0.292% KI6…	6mon: ARC: High Nestin: 0.021 ± 0.0281% Low Nestin: 0.0273 ± 0.0386% CD13: High Nestin: 0.3253 ± 0.3384% Low Nestin: 0.347 ± 0.2733% CollagenIV: High Nestin: 1.6874 ± 0.7748% Low Nestin: 1.1928 ± 0.4167% DCX: High Nestin: 0.4095 ± 0.2757% Low Nestin: 0.1921 ± 0.2007% GFAP: High Nestin: 1.7992 ± 0.8763% Low Nestin: 0.9613 ± 0.6088% IBA1: High Nestin: 1.9176 ± 0.6674% Low Nestin: 1.1443 ± 0.439% KI…	12mon: ARC: High Nestin: 0.0198 ± 0.0265% Low Nestin: 0.0116 ± 0.0223% CD13: High Nestin: 0.319 ± 0.1272% Low Nestin: 0.3549 ± 0.3229% CollagenIV: High Nestin: 1.6139 ± 0.4881% Low Nestin: 1.1636 ± 0.5359% DCX: High Nestin: 0.0928 ± 0.0709% Low Nestin: 0.0762 ± 0.0616% GFAP: High Nestin: 1.1314 ± 0.4683% Low Nestin: 0.8708 ± 0.6171% IBA1: High Nestin: 1.6918 ± 0.3614% Low Nestin: 1.2542 ± 0.5979%…		2mon: High Nestin: n = 420 Spots Low Nestin: n = 101 Spots 6mon: High Nestin: n = 22 Spots Low Nestin: n = 349 Spots 12mon: High Nestin: n = 62 Spots Low Nestin: n = 454 Spots Taken from three animals per age group.	Multiple t-tests: 2mon: ARC: t(519) = 0.08587 CD13: t(519) = 1.539 CollagenIV: t(519) = 0.3119 DCX: t(519) = 5.257 GFAP: t(519) = 0.2047 IBA1: t(519) = 0.5026 KI67: t(519) = 4.218 Nestin: t(519) = 14.58 NG2: t(519) = 5.269 PV: t(519) = 1.300 SOX2: t(519) = 7.421 6mon: ARC: t(369) = 0.7512 CD13: t(369) = 0.3553 CollagenIV: t(369) = 5.057 DCX: t(369) = 4.807 GFAP: t(369) = 6.078 IBA1: t(369) = 7.73…		Multiple t-tests: 2mon: ARC: p = 0.9853 CD13: p = 0.5496 CollagenIV: p = 0.9853 DCX: p < 0.0001 GFAP: p = 0.9853 IBA1: p = 0.9781 KI67: p = 0.0002 Nestin: p < 0.0001 NG2: p < 0.0001 PV: p = 0.6600 SOX2: p < 0.0001 6mon: ARC: p = 0.8096 CD13: p = 0.8096 CollagenIV: p < 0.0001 DCX: p < 0.0001 GFAP: p < 0.0001 IBA1: p < 0.0001 KI67: p = 0.8096 Nestin: p < 0.0001 NG2: p < 0.0001 PV: p = 0.0001 SOX2: …
		Nestin: High Nestin: 1.096 ± 0.6133% Low Nestin: 0.2013 ± 0.1254% NG2: High Nestin: 0.5633 ± 0.2859% Low Nestin: 0.4049 ± 0.1984% PV: High Nestin: 0.0953 ± 0.1475% Low Nestin: 0.0749 ± 0.1125% SOX2: High Nestin: 0.9782 ± 0.3426% Low Nestin: 0.7096 ± 0.2486%	Nestin: High Nestin: 0.792 ± 0.3965% Low Nestin: 0.1134 ± 0.1035% NG2: High Nestin: 1.5888 ± 0.4909% Low Nestin: 0.5989 ± 0.3343% PV: High Nestin: 0.274 ± 0.214% Low Nestin: 0.1169 ± 0.1564% SOX2: High Nestin: 0.6446 ± 0.2381% Low Nestin: 0.5639 ± 0.2032%	Nestin: High Nestin: 0.597 ± 0.2745% Low Nestin: 0.1103 ± 0.1081% NG2: High Nestin: 0.7329 ± 0.2432% Low Nestin: 0.4605 ± 0.2813% PV: High Nestin: 0.0908 ± 0.1027% Low Nestin: 0.1059 ± 0.1335% SOX2: High Nestin: 0.5271 ± 0.2317% Low Nestin: 0.4941 ± 0.1615%			CD13: t(514) = 0.8646 CollagenIV: t(514) = 6.27 DCX: t(514) = 1.951 GFAP: t(514) = 3.2 IBA1: t(514) = 5.621 KI67: t(514) = 4.802 Nestin: t(514) = 25.91 NG2: t(514) = 7.263 PV: t(514) = 0.8554 SOX2: t(514) = 1.422		CD13: p = 0.6250 CollagenIV: p < 0.0001 DCX: p = 0.1908 GFAP: p = 0.0087 IBA1: p < 0.0001 KI67: p < 0.0001 Nestin: p < 0.0001 NG2: p < 0.0001 PV: p = 0.6250 SOX2: p = 0.3979
Fig. 6 Supplemental	Comparison of the cellular contents of Ki67+ cell-containing and lacking spots in 2, 6, and 12-month-old mice. Values are the mean ± SD.	2mon: ARC: High Nestin: 0.0321 ± 0.0408% Low Nestin: 0.0398 ± 0.0528% CD13: High Nestin: 0.5413 ± 0.8766% Low Nestin: 0.4535 ± 0.3488% CollagenIV: High Nestin: 1.8135 ± 0.7996% Low Nestin: 1.5255 ± 0.6682% DCX: High Nestin: 1.3795 ± 0.9201% Low Nestin: 0.9719 ± 0.7247% GFAP: High Nestin: 0.8793 ± 0.4742% Low Nestin: 0.8862 ± 0.5534% IBA1: High Nestin: 0.876 ± 0.2829% Low Nestin: 0.7373 ± 0.2986% …	6mon: ARC: High Nestin: 0.0193 ± 0.0234% Low Nestin: 0.0285 ± 0.0402% CD13: High Nestin: 0.3156 ± 0.2281% Low Nestin: 0.3517 ± 0.2858% CollagenIV: High Nestin: 1.1316 ± 0.4625% Low Nestin: 1.2403 ± 0.4574% DCX: High Nestin: 0.218 ± 0.1963% Low Nestin: 0.2024 ± 0.215% GFAP: High Nestin: 1.0008 ± 0.6239% Low Nestin: 1.0131 ± 0.6642% IBA1: High Nestin: 1.1664 ± 0.44% Low Nestin: 1.195 ± 0.4998% KI67…	12mon: ARC: High Nestin: 0.0155 ± 0.0268% Low Nestin: 0.0122 ± 0.0225% CD13: High Nestin: 0.2749 ± 0.1425% Low Nestin: 0.359 ± 0.3183% CollagenIV: High Nestin: 1.2891 ± 0.6224% Low Nestin: 1.2097 ± 0.5412% DCX: High Nestin: 0.0902 ± 0.0677% Low Nestin: 0.0768 ± 0.0623% GFAP: High Nestin: 0.9791 ± 0.6124% Low Nestin: 0.8935 ± 0.6061% IBA1: High Nestin: 1.4364 ± 0.6446% Low Nestin: 1.2923 ± 0.5845%…		2mon: KI67+ : n = 222 Spots KI67- : n = 299 Spots 6mon: KI67+ : n = 62 Spots KI67- : n = 309 Spots 12mon: KI67+ : n = 52 Spots KI67- : n = 464 Spots Taken from three animals per age group.	Multiple t-tests: 2mon: ARC: t(519) = 1.803 CD13: t(519) = 1.573 CollagenIV: t(519) = 4.471 DCX: t(519) = 5.654 GFAP: t(519) = 0.1512 IBA1: t(519) = 5.362 KI67: t(519) = 19.28 Nestin: t(519) = 6.461 NG2: t(519) = 2.923 PV: t(519) = 1.692 SOX2: t(519) = 9.795 6mon: ARC: t(369) = 1.747 CD13: t(369) = 0.9378 CollagenIV: t(369) = 1.705 DCX: t(369) = 0.5287 GFAP: t(369) = 0.1335 IBA1: t(369) = 0.4191 …		Multiple t-tests: 2mon: ARC: p = 0.2582 CD13: p = 0.2582 CollagenIV: p < 0.0001 DCX: p < 0.0001 GFAP: p = 0.8799 IBA1: p < 0.0001 KI67: p < 0.0001 Nestin: p < 0.0001 NG2: p = 0.018 PV: p = 0.2582 SOX2: p < 0.0001 6mon: ARC: p = 0.535 CD13: p = 0.9239 CollagenIV: p = 0.535 DCX: p = 0.9894 GFAP: p = 0.9894 IBA1: p = 0.9894 KI67: p < 0.0001 Nestin: p = 0.9115 NG2: p = 0.9894 PV: p = 0.9894 SOX2: p =…
		Nestin: High Nestin: 1.1306 ± 0.7232% Low Nestin: 0.7685 ± 0.5559% NG2: High Nestin: 0.5736 ± 0.3153% Low Nestin: 0.5021 ± 0.243% PV: High Nestin: 0.1035 ± 0.1391% Low Nestin: 0.0823 ± 0.1429% SOX2: High Nestin: 1.0833 ± 0.3392% Low Nestin: 0.8094 ± 0.2968%	Nestin: High Nestin: 0.1795 ± 0.2672% Low Nestin: 0.1485 ± 0.1986% NG2: High Nestin: 0.633 ± 0.3939% Low Nestin: 0.6625 ± 0.4216% PV: High Nestin: 0.1295 ± 0.1292% Low Nestin: 0.1255 ± 0.1706% SOX2: High Nestin: 0.6509 ± 0.2197% Low Nestin: 0.5522 ± 0.1994%	Nestin: High Nestin: 0.2988 ± 0.3806% Low Nestin: 0.1542 ± 0.1766% NG2: High Nestin: 0.5468 ± 0.3016% Low Nestin: 0.4873 ± 0.2891% PV: High Nestin: 0.1316 ± 0.1255% Low Nestin: 0.101 ± 0.1305% SOX2: High Nestin: 0.5752 ± 0.207% Low Nestin: 0.4895 ± 0.1651%			CD13: t(514) = 1.884 CollagenIV: t(514) = 0.9876 DCX: t(514) = 1.454 GFAP: t(514) = 0.9642 IBA1: t(514) = 1.669 KI67: t(514) = 24.23 Nestin: t(514) = 4.797 NG2: t(514) = 1.403 PV: t(514) = 1.612 SOX2: t(514) = 3.453		CD13: p = 0.3912 CollagenIV: p = 0.6908 DCX: p = 0.5472 GFAP: p = 0.6908 IBA1: p = 0.5056 KI67: p < 0.0001 Nestin: p < 0.0001 NG2: p = 0.5472 PV: p = 0.5056 SOX2: p = 0.0054
Fig. 7	Measure	Values				N	Statistical test		Significance
Fig. 7B	Quantification of colocalization of CollagenIV+ vasculature, CD13+ pericytes, IBA1+ microglia, and NG2+ OPCs in 2, 6, and 12-month-old mice.	CollagenIV: 2mon: 17.07 ± 2.935% 6mon: 13.03 ± 1.600% 12mon: 19.98 ± 4.605% CD13: 2mon: 5.066 ± 2.294% 6mon: 3.743 ± 0.9027% 12mon: 7.354 ± 1.819% IBA1: 2mon: 1.748 ± 0.4603% 6mon: 3.049 ± 1.452% 12mon: 6.086 ± 1.551% NG2: 2mon: 3.464 ± 1.486% 6mon: 3.521 ± 0.9951% 12mon: 3.696 ± 0.7934%				2mon: n = 12 DGs 6mon: n = 10 DGs 12mon: n = 12 DGs Taken from three animals per age group.	Welch's ANOVA: CollagenIV: W(2,19.12) = 12.51 CD13: W(2, 19.11) = 17.88 IBA1: W(2,15.19) = 43.22 Ordinary One-Way ANOVA: NG2: F(2, 31) = 0.1349		CollagenIV: ANOVA: p = 0.0002 Dunnett's T3 Multiple Comparisons Test: 2mon vs 6mon: p = 0.0020 2mon vs 12mon: p = 0.2154 6mon vs 12mon: p = 0.0007 CD13: ANOVA: p < 0.0001 Dunnett's T3 Multiple Comparisons Test: 2mon vs 6mon: p = 0.2282 2mon vs 12mon: p = 0.0384 6mon vs 12mon: p < 0.0001 IBA1: ANOVA: p < 0.0001 Dunnett's T3 Multiple Comparisons Test: 2mon vs 6mon: p = 0.0555 2mon vs 12mon: p < 0.0…
Fig. 7D	Quantification of volumes of CollagenIV+ vasculature and IBA1+ microglia at radiating distances around Nestin+ R cell processes, and KI67+ proliferating cells. Values are the mean ± SD.	R Cells: CollagenIV 5μm 2mon: 6.988 ± 2.5201% 6mon: 4.646 ± 1.7441% 12mon: 8.693 ± 3.3318% 10μm 2mon: 4.65 ± 1.5638% 6mon: 3.308 ± 0.9951% 12mon: 4.951 ± 1.8209% 15μm 2mon: 3.713 ± 1.1911% 6mon: 2.877 ± 0.7507% 12mon: 3.526 ± 1.1649% 20μm 2mon: 3.247 ± 1.0352% 6mon: 2.665 ± 0.5792% 12mon: 2.853 ± 0.8535% 25μm 2mon: 2.988 ± 0.958% 6mon: 2.457 ± 0.4668% 12mon: 2.485 ± 0.7257% 30μm 2mon: 2.848 ± 0.9…	KI67+ Cells: CollagenIV 5μm 2mon: 5.53 ± 10.299% 6mon: 3.061 ± 8.958% 12mon: 0.94 ± 2.1252% 10μm 2mon: 5.432 ± 7.9058% 6mon: 2.921 ± 7.3834% 12mon: 1.34 ± 2.2908% 15μm 2mon: 5.298 ± 6.5468% 6mon: 2.283 ± 5.4325% 12mon: 1.732 ± 3.2699% 20μm 2mon: 5.151 ± 5.5766% 6mon: 1.869 ± 3.9111% 12mon: 1.754 ± 3.2203% 25μm 2mon: 4.92 ± 4.9765% 6mon: 1.661 ± 2.9416% 12mon: 1.829 ± 2.7075% 30μm 2mon: 4.566 ± 4.…	R Cells: IBA1 5μm 2mon: 1.74 ± 0.5362% 6mon: 2.804 ± 1.6849% 12mon: 3.883 ± 1.4535% 10μm 2mon: 1.622 ± 0.5019% 6mon: 2.403 ± 0.9659% 12mon: 2.868 ± 1.0654% 15μm 2mon: 1.542 ± 0.4906% 6mon: 2.248 ± 0.7731% 12mon: 2.485 ± 0.9419% 20μm 2mon: 1.478 ± 0.4891% 6mon: 2.165 ± 0.6903% 12mon: 2.297 ± 0.8887% 25μm 2mon: 1.418 ± 0.4877% 6mon: 2.095 ± 0.6507% 12mon: 2.178 ± 0.868% 30μm 2mon: 1.369 ± 0.479% 6m…	KI67+ Cells: IBA1 5μm 2mon: 2.064 ± 3.3988% 6mon: 4.801 ± 11.9168% 12mon: 3.094 ± 4.8564% 10μm 2mon: 2.255 ± 2.4323% 6mon: 3.847 ± 7.6021% 12mon: 3.136 ± 3.1401% 15μm 2mon: 2.276 ± 1.9099% 6mon: 3.466 ± 5.2553% 12mon: 2.528 ± 1.8656% 20μm 2mon: 2.252 ± 1.6392% 6mon: 3.09 ± 4.0166% 12mon: 2.34 ± 1.5369% 25μm 2mon: 2.187 ± 1.4788% 6mon: 2.899 ± 3.2127% 12mon: 2.254 ± 1.4155% 30μm 2mon: 2.104 ± 1.33…	R Cell Radial Processes: 2mon: n = 12 DGs 6mon: n = 10 DGs 12mon: n = 12 DGs KI67+ Proliferating Cells: 2mon: n = 141 Cells 6mon: n = 32 Cells 12mon: n = 26 Cells Taken from three animals per age group.	Mixed Effects Analysis: R Cells: CollagenIV Radius: F (1.110, 34.40) = 121.4 Age: F (2, 31) = 2.521 Radius x Age: F (32, 496) = 8.114 KI67+ Cells: CollagenIV Radius: F(1.541, 302.0) = 2.069 Age: F(2, 196) = 11.44 Radius x Age: F(32, 3136) = 1.190 R Cells: IBA1 Radius: F (1.161, 35.99) = 75.69 Age: F (2, 31) = 5.230 Radius x Age: F (32, 496) = 8.675 KI67+ Cells: IBA1 Radius: F(1.342, 261.6) = 7.60…		R Cells: CollagenIV Mixed Effects Analysis: Radius: p < 0.0001 Age: p = 0.0967 Radius x Age: p < 0.0001 Tukey's Multiple Comparison Tests: 5μm 2mon vs. 6mon: p = 0.0471 2mon vs. 12mon: p = 0.3526 6mon vs. 12mon: p = 0.0053 10μm 2mon vs. 6mon: p = 0.0614 2mon vs. 12mon: p = 0.9017 6mon vs. 12mon: p = 0.0391 15μm 2mon vs. 6mon: p = 0.1396 2mon vs. 12mon: p = 0.9199 6mon vs. 12mon: p = 0.2804 20μm 2…	KI67+ Cells: CollagenIV Mixed Effects Analysis: Radius: p = 0.1397 Age: p < 0.0001 Radius x Age: p = 0.214 Tukey's Multiple Comparison Tests: 5μm 2mon vs. 6mon: p = 0.3652 2mon vs. 12mon: p < 0.0001 6mon vs. 12mon: p = 0.4072 10μm 2mon vs. 6mon: p = 0.2104 2mon vs. 12mon: p < 0.0001 6mon vs. 12mon: p = 0.4928 15μm 2mon vs. 6mon: p = 0.0233 2mon vs. 12mon: p = 0.0002 6mon vs. 12mon: p = 0.8825 20μ…	R Cells: IBA1 Mixed Effects Analysis: Radius: p < 0.0001 Age: p = 0.011 Radius x Age: p < 0.0001 Tukey's Multiple Comparison Tests: 5μm 2mon vs. 6mon: p = 0.1817 2mon vs. 12mon: p = 0.0008 6mon vs. 12mon: p = 0.275 10μm 2mon vs. 6mon: p = 0.0896 2mon vs. 12mon: p = 0.0057 6mon vs. 12mon: p = 0.5412 15μm 2mon vs. 6mon: p = 0.0607 2mon vs. 12mon: p = 0.0182 6mon vs. 12mon: p = 0.7959 20μm 2mon vs. …	KI67+ Cells: IBA1 Mixed Effects Analysis: Radius: p = 0.0028 Age: p = 0.0271 Radius x Age: p = 0.0009 Tukey's Multiple Comparison Tests: 5μm 2mon vs. 6mon: p = 0.4085 2mon vs. 12mon: p = 0.5517 6mon vs. 12mon: p = 0.7421 10μm 2mon vs. 6mon: p = 0.4719 2mon vs. 12mon: p = 0.3629 6mon vs. 12mon: p = 0.8807 15μm 2mon vs. 6mon: p = 0.4169 2mon vs. 12mon: p = 0.7824 6mon vs. 12mon: p = 0.6189 20μm 2mo…
