# Supplementary material for: Characterization of the neurogenic niche in the aging dentate gyrus using iterative immunofluorescence imaging
Source: eLife. 2022 Jan 28;11:e68000. doi: 10.7554/eLife.68000 (PMC8798039; doi:10.7554/eLife.68000)
Supplement: Supplementary file 2. [file elife-68000-supp2.xlsx]

## Sheet: Sheet2
	Fluorophore
Combination	Alexa 488	Cy3	Alexa 647
1	IBA1	SOX2	HOPX
2	Nestin		S100B
3	DCX	Parvalbumin	SOX2
4	CD13	ID4	LaminB1
5	Phosphorylated Histone3		NG2
6			MT3
7	OLIG2		ARC
8	CollagenIV		GFAP
